## Addendum

## Addendum: Unravelling actionable biology using transcriptomic data to integrate mitotic index and Ki-67 in the management of lung neuroendocrine tumors

Venkata S.K. Manem<sup>1</sup>, Olga Sazonova<sup>1</sup>, Andréanne Gagné<sup>1</sup>, Michèle Orain<sup>1</sup>, Babak Khoshkrood-Mansoori<sup>1</sup>, Nathalie Gaudreault<sup>1</sup>, Yohan Bossé<sup>1,2</sup> and Philippe Joubert<sup>1,3</sup>

<sup>1</sup>Quebec Heart and Lung Institute Research Center, Quebec City, QC G1V4G5, Canada

<sup>2</sup>Department of Molecular Medicine, Laval University, Quebec City, QC G1V4G5, Canada

<sup>3</sup>Department of Medical Biochemistry, Molecular Biology and Pathology, Laval University, Quebec City, QC G1V4G5, Canada

**Published:** December 06, 2022

**Copyright:** © 2022 Manem et al. This is an open access article distributed under the terms of the [Creative Commons Attribution License](#) (CC BY 3.0), which permits unrestricted use, distribution, and reproduction in any medium, provided the original author and source are credited.

**This article has an addendum:** All human tissues were sourced from the IUCPQ Biobank, which includes only patients that have signed a consent form for research.

Original article: Oncotarget. 2021; 12:209–220. <https://doi.org/10.18632/oncotarget.27874>
